# Supplementary material for: Co-solvent polarity tuned thermochromic nanotubes of cyclic dipeptide–polydiacetylene supramolecular system
Source: Royal Society of Chemistry journal article supplement (doi:10.1039/d0ra05656a), 2020-01-01
Supplement: d0ra05656a1.pdf [file d0ra05656a1.pdf]

## Electronic Supplementary Information

### Co-solvent polarity tuned thermochromic nanotubes of cyclic dipeptide– polydiacetylene supramolecular system.

Mohammed Iqbal Khazi,<sup>a</sup> Chenikkayala Balachandra,<sup>b</sup> Geon Shin,<sup>c</sup> Gang-Hee Jang,<sup>c</sup> Thimmaiah Govindaraju<sup>b,\*</sup> and Jong-Man Kim<sup>a,c,\*</sup>

<sup>a</sup> Institute of Nano Science and Technology, Hanyang University, Seoul 04763, Korea

<sup>b</sup> Bioorganic Chemistry Laboratory, New Chemistry Unit and the School of Advanced Materials (SAMat), Jawaharlal Nehru Centre for Advanced Scientific Research, Jakkur P.O., Bengaluru, Karnataka 560064, India.

<sup>c</sup> Department of Chemical Engineering, Hanyang University, Seoul 04763, Korea.

\*Corresponding authors:

E-mail address: [tgraju@jncasr.ac.in](mailto:tgraju@jncasr.ac.in) (Thimmaiah Govindaraju) and [jmk@hanyang.ac.kr](mailto:jmk@hanyang.ac.kr) (Jong-Man Kim)

| <b>Contents</b> |                                                                                                                    | <b>Page no.</b> |
|-----------------|--------------------------------------------------------------------------------------------------------------------|-----------------|
| <b>1.</b>       | <b>Experimental Section</b>                                                                                        | <b>2~3</b>      |
| <b>2.</b>       | <b>Synthesis of CDP-DA</b>                                                                                         | <b>4</b>        |
| <b>3.</b>       | <b>NMR and MALDI-TOF spectra for CDP-DA (Fig. S1~S2)</b>                                                           | <b>5~6</b>      |
| <b>4.</b>       | <b>Table for the morphology of CDP-DA in the different volume ratio of chloroform/ methanol mixture (Table S1)</b> | <b>7</b>        |
| <b>5.</b>       | <b>SEM images of CDP-DA for various solvents (Fig. S3)</b>                                                         | <b>8</b>        |
| <b>6.</b>       | <b>Powder X-ray diffraction pattern of CDP-DA (Fig. S4)</b>                                                        | <b>9</b>        |
| <b>7.</b>       | <b>Reversible thermochromic response of CDP-PDA (Fig. S5)</b>                                                      | <b>10</b>       |
| <b>8.</b>       | <b>SEM images of CDP-PDA nanotubes before and after heating (Fig. S6)</b>                                          | <b>11</b>       |
| <b>9.</b>       | <b><sup>1</sup>H NMR and FT-IR spectra for hydrogen bonding effect of CDP-DA (Fig. S7)</b>                         | <b>12</b>       |

## **1. Experimental section**

### **1.1 Materials**

L-Phenylalanine, 1-hydroxybenzotriazole hydrate, piperidine, triisopropylsilane and propylphosphonic anhydride (50% in ethyl acetate) were purchased from Sigma Aldrich (Korea). 10,12-Pentacosadiynoic acid (PCDA) was purchased from GFS Chemicals. Thionyl Chloride (1 mol/L in dichloromethane), 1-(3-dimethylaminopropyl)-3-ethylcarbodiimide hydrochloride, N,N-diisopropylethylamine, trifluoroacetic acid were purchased from TCI. Triethylamine was purchased from Daejung (Korea). All the other chemicals used were analytical grade reagents.

### **1.2 Instruments**

SEM of nanotube morphology was conducted with a JEOL (JSM-6330F) FE-SEM. TEM investigations were carried out using a JEOL TEM-2100F microscope. The absorption spectra were recorded on a USB2000 miniature fiber-optic spectrometer (Ocean Optics). IR spectra were recorded on a Thermo Nicolet NEXUS 470 FTIR using an ATR accessory (Thermo Fisher Scientific, Inc.). The  $^1\text{H}$  and  $^{13}\text{C}$  NMR spectra were recorded on a Varian UnityNova (300 and 600 MHz) spectrometer at 298 K in  $\text{CDCl}_3$  and  $\text{DMSO-d}_6$ . Mass spectra were recorded on a AXIMA MALDI-TOF (SHIMADZU). XRD spectra were recorded with a minFlex600 (Rigaku, Germany). Raman spectra were recorded on a LabRAM HR Evolution Raman Spectrometer (Horiba Scientific, 785nm laser source).

## 1. Syntheses of CDP [Cyclo(L-Lys-L-Phe)]

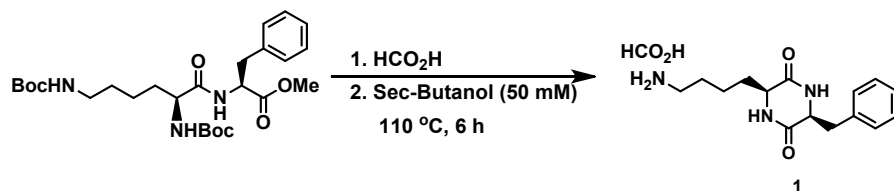

**Syntheses of (3*S*,6*S*)-3-(4-aminobutyl)-6- benzylpiperazine-2,5-dione (1).** The cyclo (L-Lys-L-Phe) was synthesized by following the previously reported procedure.<sup>1</sup> The dipeptide εN-Boc, αN-Boc-Lys-Phe-OMe (5.1 g, 10.05 mmol) was subjected to Boc deprotection by treating with formic acid. The dipeptide was dissolved in formic acid (80 mL) and stirred at room temperature for 2 h. The reaction was monitored by thin layered chromatography (TLC). After completion of the reaction, all the volatiles were evaporated under reduced pressure. The obtained residue was co-evaporated with toluene (2 × 60 mL) and dried under vacuum for 30 min. Then the residue was re-dissolved in sec-butanol (195 mL, ~50 mM) and allowed to stir at 110 °C in an oil bath for 6 h. After 30 min, the formation of a white precipitate was observed, and a thick curdy white precipitate was formed with time. After 6 h, the reaction was stopped and brought to room temperature. Then the maximum amount of volatiles was evaporated using a rotary evaporator under reduced pressure and a thick white suspension was obtained. The thick white suspension was filtered under vacuum using a sintered funnel and was washed with dichloromethane. The white precipitate was dried under vacuum to obtain the pure product as a white solid (2.0 g, 67% yield) and was characterized by <sup>1</sup>H & <sup>13</sup>C NMR and HRMS analysis.

## 2. Synthesis of CDP-DA

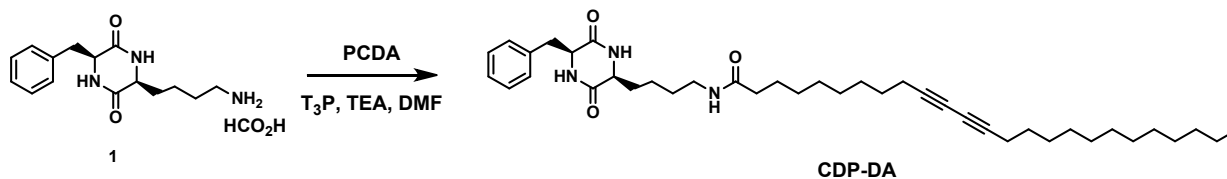

### N-(4-((2S,5S)-5-benzyl-3,6-dioxopiperazin-2-yl)butyl)pentacosadiynamide (CDP-DA)

To a solution of cyclo(L-lys-L-phe) formic acid salt (250 mg, 0.311 mmol, 1 equiv), 10,12-pentacosadiynoic acid (350 mg, 0.373 mmol, 1.2 equiv) and triethylamine (0.55 mL, 1.245 mmol, 5 equiv) in 10 mL of DMF was added a solution of propylphosphonic anhydride (0.7 mL, 0.467 mmol, 1.5 equiv) at room temperature and stirred overnight at 60 °C. The reaction mixture was cooled at RT, and then solid was collected by filtration and washed with EA. The crude material was triturated /washed with ACN to afford title compound (220 mg, 45%). <sup>1</sup>H NMR: (600 MHz, DMSO-d<sub>6</sub>): δ 8.13 (d, *J* = 2.4 Hz, 1H), 8.03 (d, *J* = 2.4 Hz, 1H), 7.25 (t, *J* = 6 Hz, 2H), 7.20 (t, *J* = 6 Hz, 2H), 7.15 (d, *J* = 6 Hz, 1H), 4.18 (t, *J* = 6 Hz, 1H), 3.54 (t, *J* = 6 Hz, 1H), 3.14 (dd, 6 Hz, 12 Hz, 1H), 2.85-2.80 (m, 3H), 2.27 (t, *J* = 6 Hz, 4H), 2.01 (t, *J* = 6 Hz, 2H), 1.49-1.41 (m, 6H), 1.32-1.24 (m, 24H), 1.10-1.01 (m, 4H), 0.85 (t, *J* = 6 Hz, 3H), 0.77-0.71 (m, 2H), 0.65-0.59 (m, 2H); <sup>13</sup>C NMR: (75 MHz, CDCl<sub>3</sub>) 173.4, 167.4, 166.9, 135.2, 129.8, 129.0, 127.5, 65.2, 56.1, 54.7, 45.5, 39.8, 38.5, 37.6, 36.8, 32.7, 31.9, 30.2, 29.6, 29.4, 29.3, 29.2, 29.1, 29.0, 28.9, 28.8, 28.7, 28.3, 28.2, 25.7, 22.6, 21.3, 19.2, 16.0, 15.2, 14.1; IR (cm<sup>-1</sup>) ν<sub>max</sub>: 3302, 3190, 3057, 2919, 2848, 1685, 1640, 1541, 1453, 1338, 1253, 1218, 1191, 1102, 820, 744, 721, 697, 576, 480, 447; MS (MALDI-TOF, m/z): calcd. for C<sub>40</sub>H<sub>61</sub>N<sub>3</sub>O<sub>3</sub> [M+Na]<sup>+</sup>654.46, found 654.19

## References

1. C. Balachandra, T. Govindaraju, *J. Org. Chem.*, 2020, **85**, 1525–1536.

### 3. NMR and MALDI-TOF spectra for CDP-DA

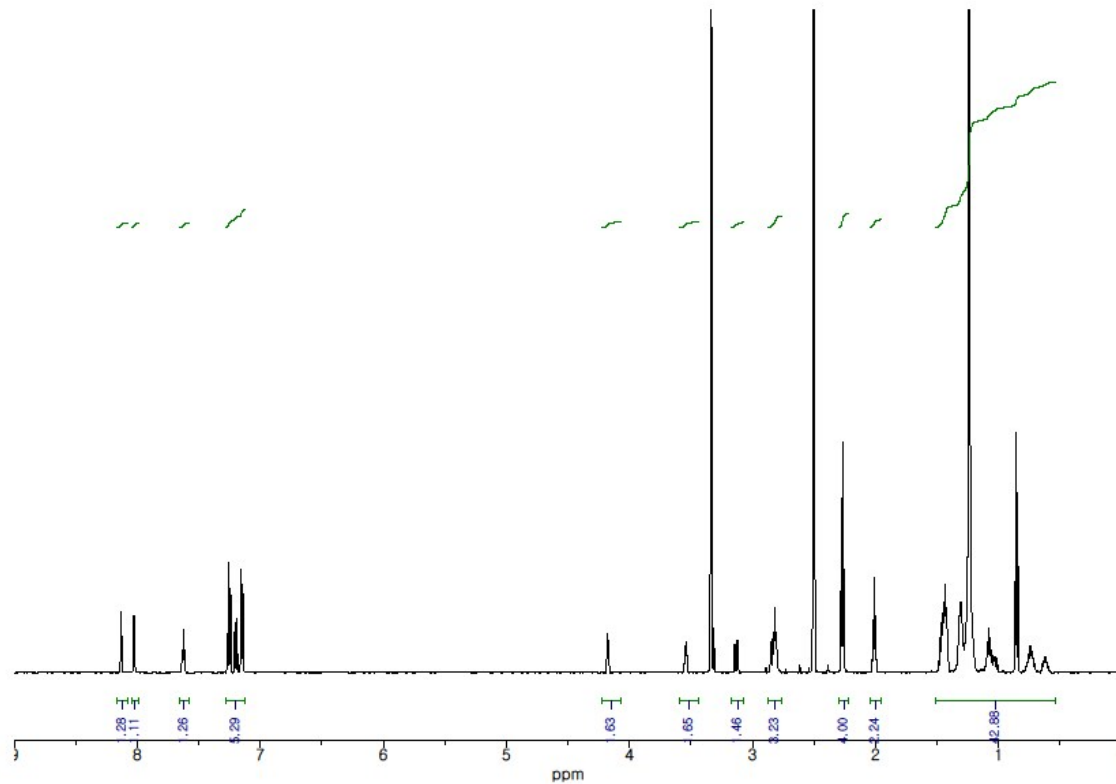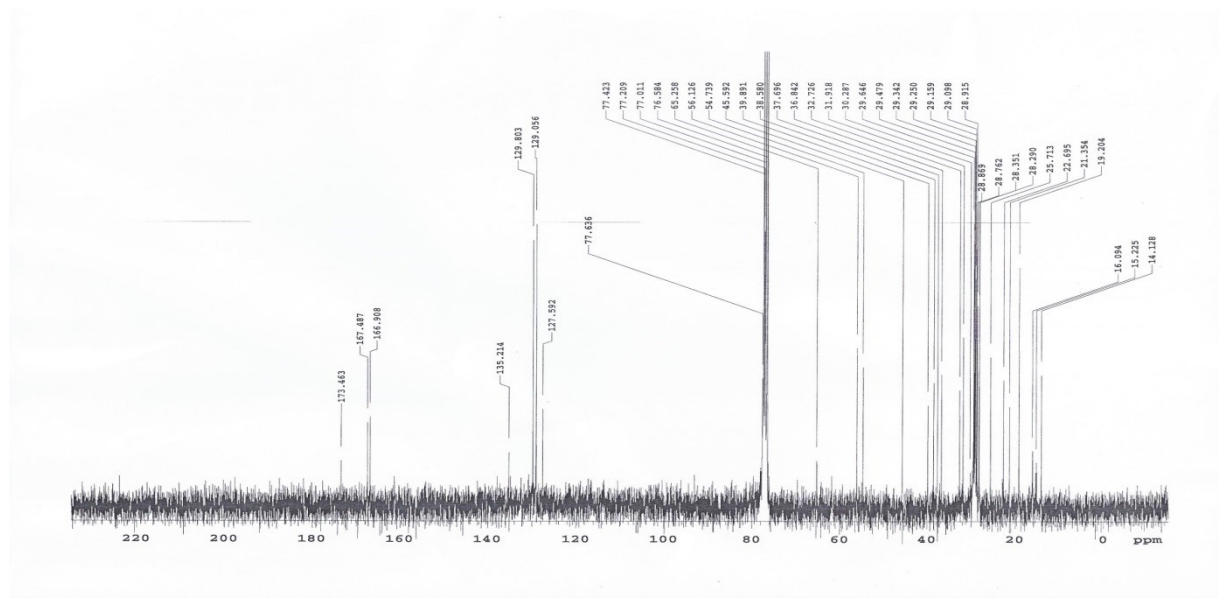

**Figure S1.**  $^1\text{H}$  (top, 600 MHz,  $\text{DMSO-d}_6$ ) and  $^{13}\text{C}$  (bottom, 75 MHz,  $\text{CDCl}_3$ ) NMR spectra of N-(4-((2S,5S)-5-benzyl-3,6-dioxopiperazin-2-yl)butyl)pentacos-10,12-diynamide (CDP-DA).

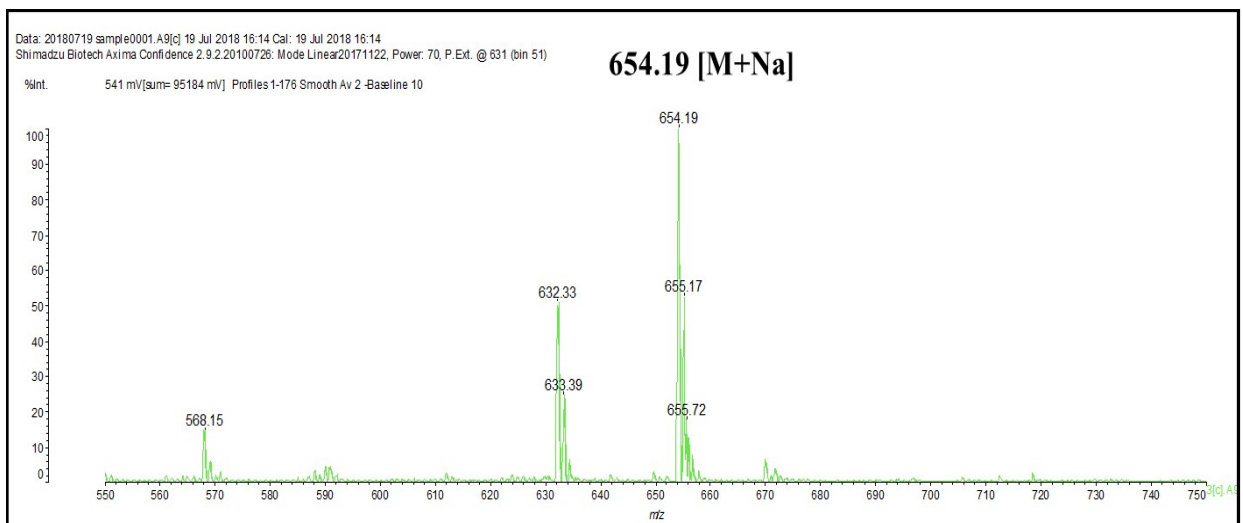

**Figure S2.** MALDI-TOF spectrum of N-(4-((2S,5S)-5-benzyl-3,6-dioxopiperazin-2-yl)butyl)pentacosamide(CDP-DA). MS (MALDI-TOF, m/z): calcd. for  $C_{56}H_{90}N_2O_6$  [M+Na] 654.46, found 654.19

**4. Table for morphologies of CDP-DA in the different volume ratio of chloroform/ methanol mixture**

|                | Chloroform | Chloroform<br>Methanol<br>(3 : 1) | Chloroform<br>Methanol<br>(2 : 1) | Chloroform<br>Methanol<br>(1 : 1) | Chloroform<br>Methanol<br>(1 : 2) | Chloroform<br>Methanol<br>(1 : 3) | Methanol    |
|----------------|------------|-----------------------------------|-----------------------------------|-----------------------------------|-----------------------------------|-----------------------------------|-------------|
| Phase          | Clear gel  | Solution                          | Solution                          | Nanotube<br>+<br>Plate            | Nanotube                          | Nanotube                          | Nanotube    |
| Polymerization | X          | X                                 | X                                 | ○<br>(Blue)                       | ○<br>(Blue)                       | ○<br>(Blue)                       | ○<br>(Blue) |

**Table S1.** Morphology of CDP-DA in the different volume ratio of chloroform/ methanol mixture

## 5. SEM images of CDP-DA in various solvents

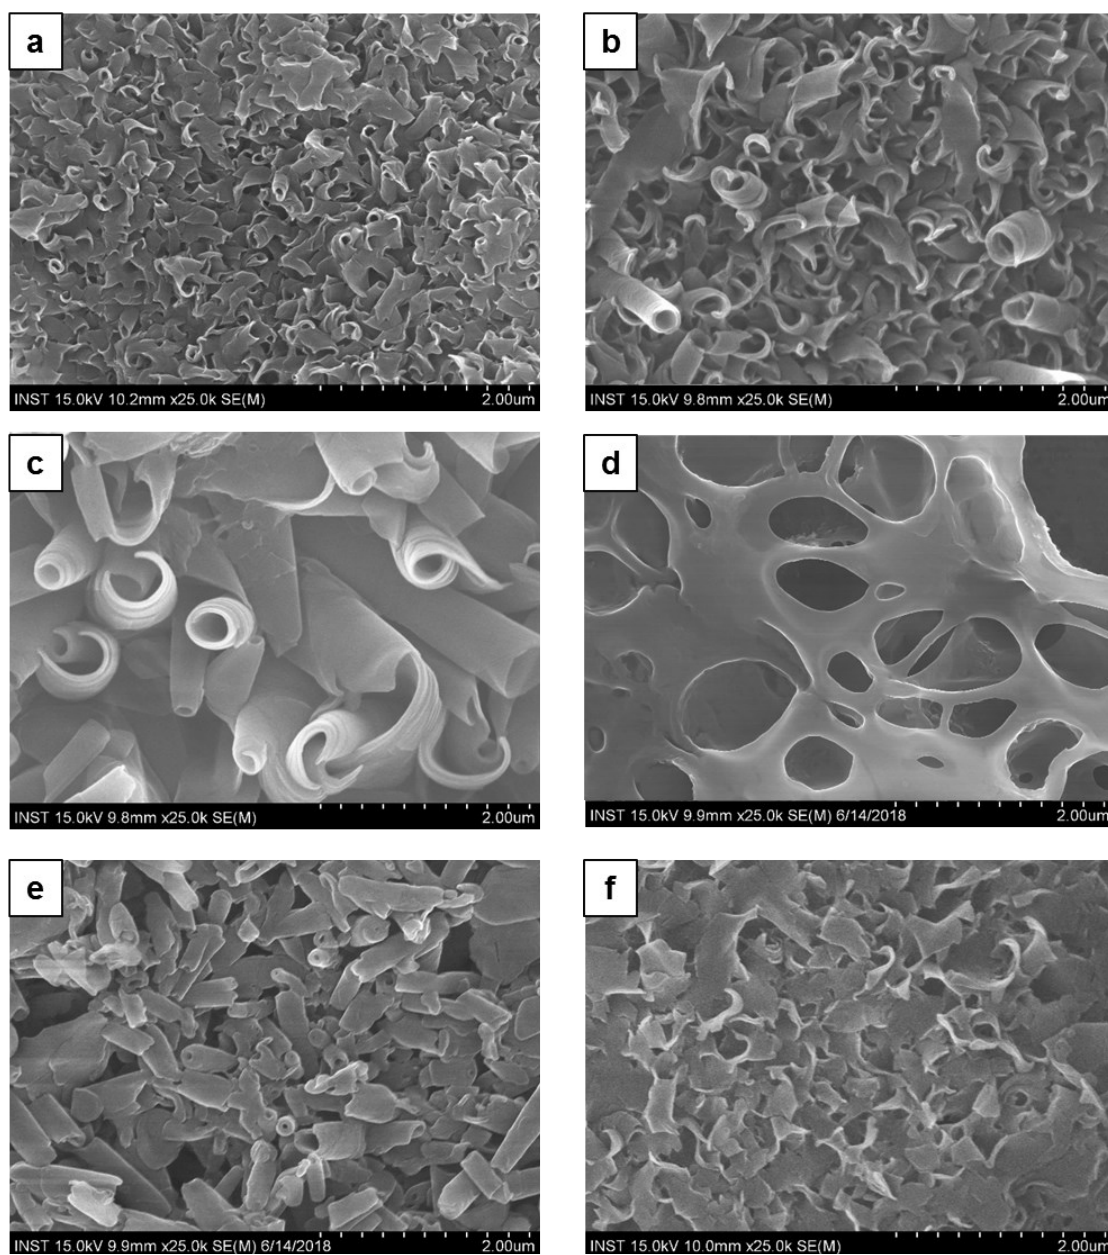

**Figure S3.** SEM images of CDP-DA in different solvent systems (a) tetrahydrofuran (b) ethyl acetate (c) isopropyl alcohol (d) dichloromethane (e) DMSO : Water (3:1 v/v) (f) acetone



## 6. Powder X-ray diffraction pattern of CDP-DA

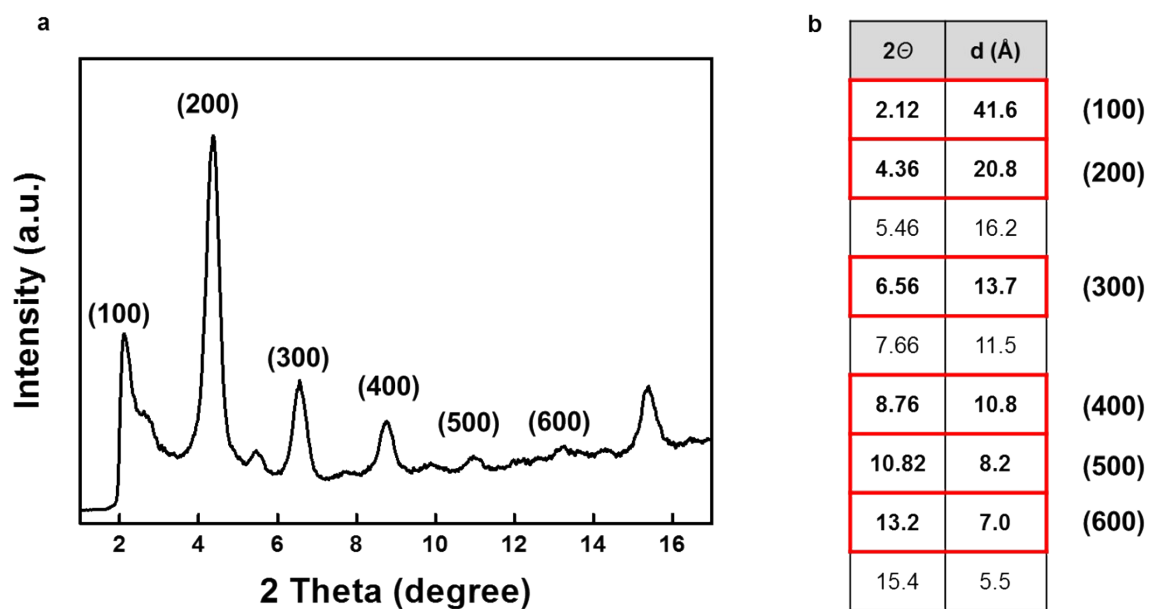

Figure S4. Powder X ray diffraction

**Figure S4.** Powder X-ray diffraction of CDP-DA (a) powder X-ray diffraction spectrum (b) Table of calculated  $2\theta$  theta values.

## 7. Thermochromic response of CDP-PDA

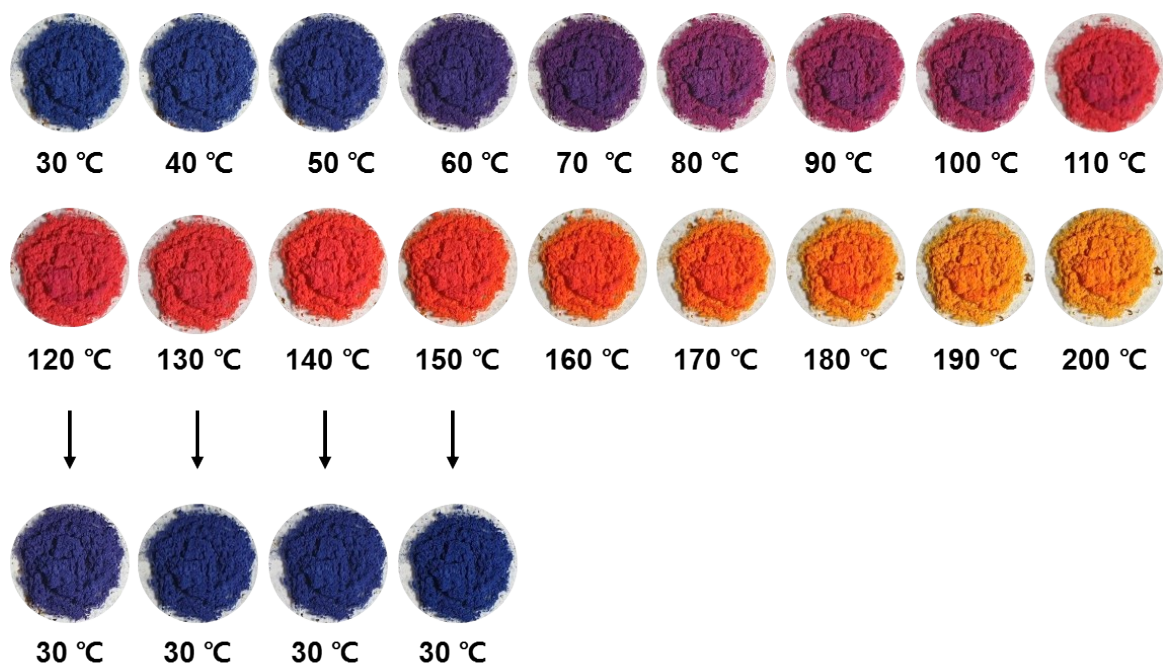

**Figure S5.** Thermochromic response of CDP-PDA 30 °C to 200 °C.

## 8. SEM images of CDP-PDA before and after heating

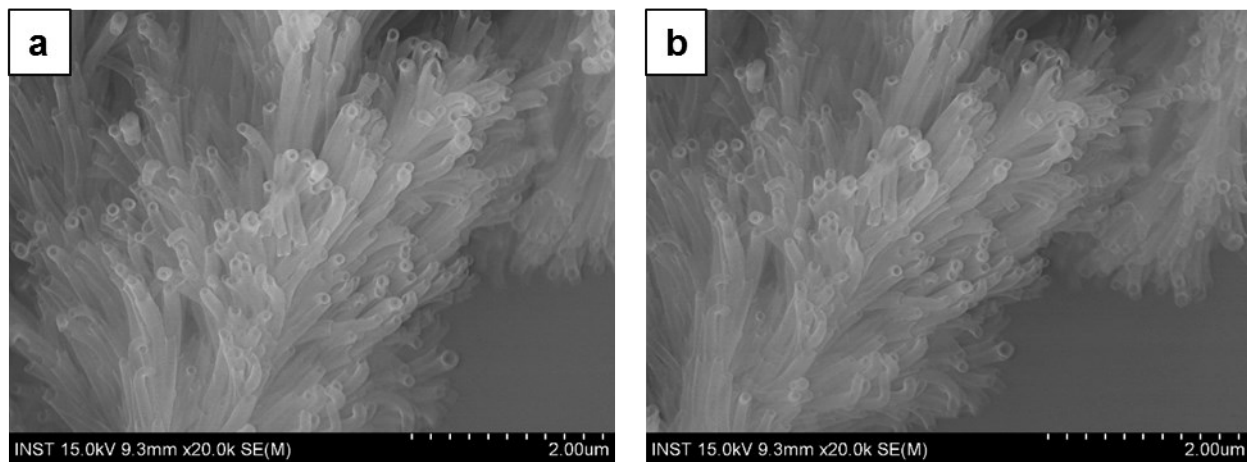

**Figure S6.** SEM images of CDP-PDA nanotubes (a) before and (b) after heating at 150 °C for 5 minutes.

## 9. $^1\text{H}$ NMR and FT-IR spectra for hydrogen bonding effect of CDP-DA

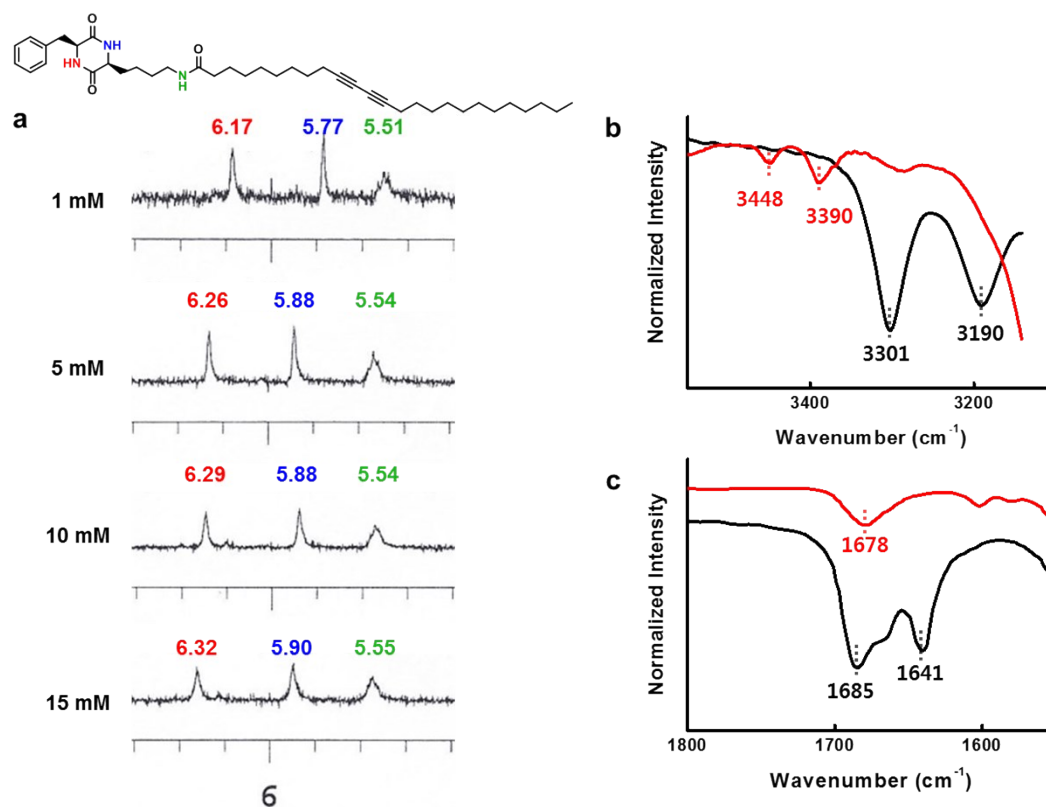

**Figure S7.** (a)  $^1\text{H}$  NMR ( $\text{CDCl}_3$ ) peak shift of CDP-DA solution dependent on concentration. (b, c) FT-IR spectra of CDP-DA solution in chloroform (red) and powder (black).
